# Supplementary material for: Indirect detection of lead(ii), cadmium(ii) and mercury(ii) on a microfluidic electrophoresis chip
Source: Royal Society of Chemistry journal article supplement (doi:10.1039/d4ay01174k), 2024-01-01
Supplement: d4ay01174k1.pdf [file d4ay01174k1.pdf]

## Indirect detection of lead (II), cadmium (II) and mercury (II) on microfluidic electrophoresis chip

Shuai Yuan <sup>1,2,\*</sup>

<sup>1</sup> School of Health and Life Sciences, University of Health and Rehabilitation Sciences, Qingdao, Shandong 266113, China

<sup>2</sup> College of Mechanical and Electrical Engineering, Central South University, Changsha, Hunan 410083, China

\*Correspondence: Shuai Yuan (yuanshuai1006@hotmail.com)

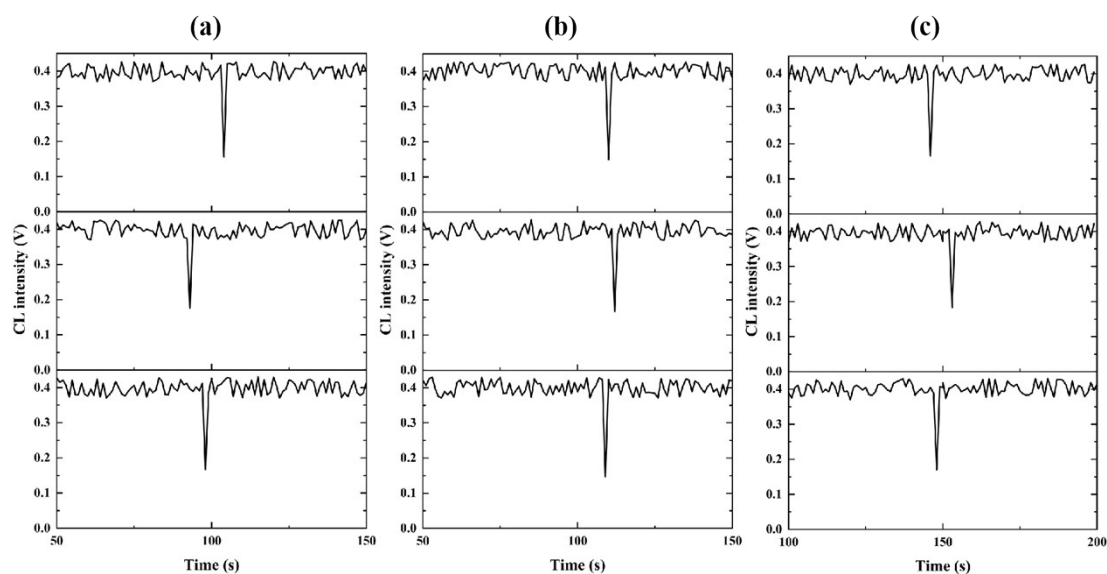

**Fig. S1.** The time taken by different heavy metal ions to reach the detection area under three detection experiments: (a) Cd (II), (b) Pb (II) and (c) Hg (II). After calculation, the average time for Cd (II), Pb (II) and Hg (II) ions to reach the detection area is 98 s, 109 s and 149 s, respectively.

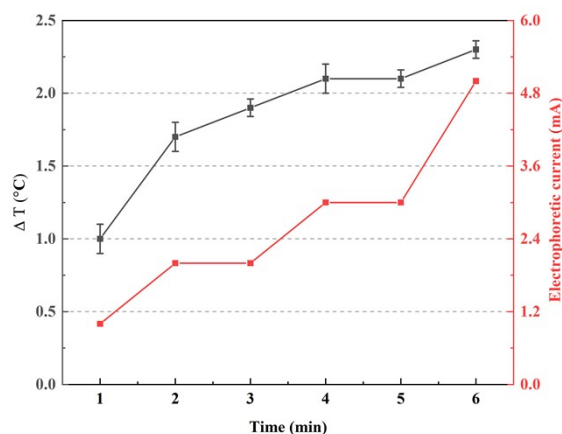

**Fig. S2.** Development of temperature and electrophoretic current over time in the electrophoretic separation channel.  $\Delta T$  indicates the temperature difference.

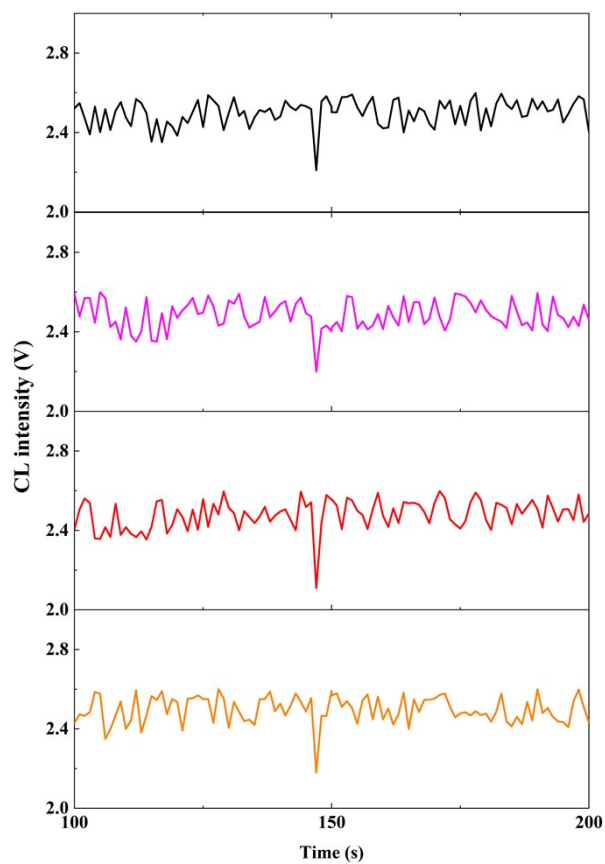

**Fig. S3.** Electropherograms: Hg (II) at a concentration of  $1 \times 10^{-5}$  M was injected four times.
